# Supplementary material for: Mutation burden-orthogonal tumor genomic subtypes delineate responses to immune checkpoint therapy
Source: PubMed Central journal article supplement — J Immunother Cancer. 2022 Jul 14;10(7):e004831. doi: 10.1136/jitc-2022-004831 (PMC9289027; doi:10.1136/jitc-2022-004831), 2022-07-14
Supplement: jitc-2022-004831supp001.pdf [file jitc-2022-004831supp001.pdf]

## Supplementary data

### Supplementary methods

- Analysis of TCGA samples
- Analysis of non-TCGA datasets
- Statistical analyses
- Data and code availability

### Supplementary figures

- Figure S1. Characteristics of the eight tumor genomic subtypes derived from TCGA solid tumors (N=9794)
- Figure S2. Features of SMOKING (SMK) subtype (n=1072)
- Figure S3. Features of ULTRAVIOLET LIGHT (UVL) subtype (n=401)
- Figure S4. Features of APOBEC (APB) subtype (n=1036)
- Figure S5. Features of MISMATCH REPAIR DEFICIENCY (MRD) subtype (n=339)
- Figure S6. Features of *POLE* (POL) subtype (n=81)
- Figure S7. Features of HOMOLOGOUS RECOMBINATION DEFICIENCY (HRD) subtype (n=1956)
- Figure S8. Features of GENOMICALLY STABLE (GNS) subtype (n=909)
- Figure S9. Consistency of clustering results from different variant callers
- Figure S10. Developing classifiers through machine learning algorithms
- Figure S11. Tumor subtyping by GS-PRACTICE in the PCAWG datasets
- Figure S12. Relationship between tumor genomic subtype, response rate and cancer type in the whole cohort
- Figure S13. Studies examined by type of drug
- Figure S14. Study in the dataset from the KEYNOTE trials, which were prospective cohort studies of patients treated with solely pembrolizumab (n=311)
- Figure S15. Studies using the cohorts' optimal TMB cutoff or logarithmic TMB as a continuous value
- Figure S16. Study using TcellExTRECT score
- Figure S17. Study excluding the Anagnostou et al. dataset
- Figure S18. Association between TMB and ICI response divided by irGS status per dataset
- Figure S19. Determination of MSI-high cases using MSIsensor
- Figure S20. Comparison of the number of missense mutations or non-synonymous SNVs from our WES pipeline and previously published data

### Supplementary tables

- Table S1. COSMIC version2 mutational signatures and proposed etiologies
- Table S2. Datasets for evaluating subtype classification
- Table S3. Datasets for evaluating ICI treatment response
- Table S4. Per-sample annotations of the ICI response validation cohort

### References

## Methods

### Analysis of TCGA samples

#### Sample selection and collection of clinical information

Clinical and somatic gene mutation profiles of all tumors except diffuse large B-cell lymphoma, acute myeloid leukemia, and thymoma, PanCancer Atlas datasets were downloaded from cBioPortal<sup>1</sup> (29 studies, 10075 cases). Information on smoking habit and HPV infection status was obtained from GDAC<sup>2</sup>. Among these tumors, 9794 cases for which the somatic mutation profiles analyzed by Mutect2<sup>3</sup> in the MAF format were available from the GDC portal<sup>4</sup> were selected for analysis.

The annotation of cancer types with FDA approval for ICI monotherapy was based on a previous report<sup>5</sup>. The response rates for ICI monotherapy for each tumor type were obtained from previous reports<sup>6,7</sup>. The response rate data for endometrial cancer with mismatch repair deficiency or with mismatch repair proficiency were calculated from another previous report<sup>8</sup>.

#### Identification of genomic subtypes based on mutational signatures

Using MutationalPatterns<sup>9</sup>, the contribution values of each sample to COSMIC v2 30 mutational signatures<sup>10</sup> were calculated from the four different somatic mutation profiles, which were pre-computed using Mutect2<sup>3</sup>, Varscan2<sup>11</sup>, MuSE<sup>12</sup>, and Somatic Sniper<sup>13</sup> and were available in the MAF format on the GDC portal<sup>4</sup>. Using the log10 transformed values of these contribution values, unsupervised hierarchical clustering with Ward's method was performed.

#### Annotation of gene alterations

Somatic gene mutations annotated as significant in the PanCancer Atlas studies of cBioPortal<sup>1</sup> were included, while those marked as mutations of unknown significance were excluded. For germline mutations, we obtained the annotations from a previous report<sup>14</sup>, where those annotated as “likely pathogenic” or “pathogenic” in “Overall Classification” column were retained. For gene mutations in *BRCA1* and *BRCA2*, we extracted those with locus-specific LOH or homozygous deletions as we previously reported<sup>15</sup>. For gene promoter methylations in *MLH1* and *BRCA1*, we obtained annotations from a previous report<sup>16</sup>.

#### Insertions and deletions-based mutational signature 6

To investigate the features of HRD subtype tumors, we calculated indel signature 6, a signature derived from small insertions and deletions (ID) that has been reported to be associated with the HRD phenotype in recent whole genome sequencing studies<sup>17</sup>. The annotated somatic mutations called by Mutect2 were obtained from the GDC portal<sup>4</sup> in the VCF format, and the insertions and deletions with "PASS" annotations were extracted. The contribution values of each sample to the COSMIC reference ID signatures<sup>10</sup> were calculated using YAPSA<sup>18</sup>. The ratio of contribution values of indel signature 6 to the number of all detected mutations was calculated as the indel signature 6 ratio.

#### MSI score and MSI-high annotation

We calculated MSI scores of all samples using MSI sensor<sup>19</sup> with the default parameters from normal-tumor paired whole exome sequencing (WES) data. For UCEC, CRC, STAD, and ESCA, MSI status was obtained from the clinical information in cBioPortal. Within these samples, the optimal cutoff value of MSI score for the annotated MSI-high cases was calculated using the ROC curve and the Youden index (Figure S19A,B). Then, for the other cancer types, samples with the score above this cutoff were determined to be MSI-high (Figure S19C).

#### Other genomic alterations scores

The following scores were calculated from the somatic mutation profiles calculated by Mutect2. Tumor mutational burden: the number of missense mutations. Total indel count: the total number of frameshift insertions, inframe insertions, frameshift deletions, and inframe deletions. Indel ratio: the ratio of the total indel count to the total number of

detected mutations, including synonymous mutations. Insertion to indel ratio: the ratio of the total number of frameshift insertions and inframe insertions to the total indel count.

For predicted neoantigens counts based on netMHCpan<sup>20</sup>, we obtained the pre-computed data for SNVs and indels from a previous report<sup>21</sup>.

For chromosomal changes, we obtained HRD scores and CNV burden scores from the GDC portal<sup>4</sup>.

### Gene expression scores

We obtained batch-corrected gene expression values from a previous report<sup>21</sup>. The CYT score was calculated from the geometric mean of the expression levels of *GZMA* and *PRFI* according to the previous report<sup>22</sup>. We obtained a gene set "HALLMARK\_PI3K\_AKT\_PATHWAY" from MSigDB<sup>23</sup> and calculated its enrichment score using ssGSEA<sup>24</sup>. In addition, using the literature<sup>25</sup> as a reference, the GEP score was calculated as the sum of each gene expression multiplied by the following coefficients: *CL5*=0.008346; *CD27*=0.072293; *CD274*=0.042853; *CD276*=-0.0239; *CD8A*=0.031021; *CMKLR1*=0.151253; *CXCL9*=0.074135; *CXCR6*=0.004313; *HLA.DQA1*=0.020091; *HLA.DRB1*=0.058806; *HLA.E*=0.07175; *IDO1*=0.060679; *LAG3*=0.123895; *NKG7*=0.075524; *PDCD1LG2*=0.003734; *PSMB10*=0.032999; *STAT1*=0.250229; *TIGIT*=0.084767.

### TcellExTRECT score

BAM files from primary tumor samples of skin cutaneous melanoma (SKCM), head and neck squamous cell carcinoma (HNSC), lung adenocarcinoma (LUAD), lung squamous cell carcinoma (LUSC), and bladder urothelial carcinoma (BLCA) were downloaded from the GDC portal and used as input to calculate the TcellExTRECT score as previously reported<sup>26</sup>. Samples with 'qcFit' values greater than 4 were excluded from the analysis. Because adjustments for 'TCRA.fraction.score' by known tumor purity and copy number status did not improve the positive correlation with T-cell related gene expressions, the score was used without such adjustments.

### Development of GS-PRACTICE

Using the 30 signature contribution values as features and the genomic subtypes as labels in the selected 7181 samples (Figure S9C), we built four independent classifiers from four different algorithms, namely, k-nearest neighbor, support vector machine, logistic regression, and random forest using the Scikit-learn module in Python. For the former three classifiers, the main hyperparameters were optimized by double cross-validation (Figure S10A). First, the above selected TCGA samples were divided into two parts, X1 and X2. Second, parameters were calculated using X1 by two-fold cross-validation, and those parameters were evaluated using X2 as test data. Third, X1 and X2 were swapped, and the same calculations were performed. These processes were repeated 100-1000 times to determine the optimal parameters (Figure S10A). For the random forest model, since parameter adjusting hardly changed the prediction accuracy, the default settings were used.

After calculating the contribution values of the 30 mutational signatures from external somatic mutation profiles in VCF or MAF format using MutationalPatterns<sup>9</sup>, the four classifiers independently make predictions using these values as input, and then integrate the results to output the final classification (Figure 2A). In the classification into eight subtypes, if the results from three or more classifiers matched, the matched result was determined to be the subtype, otherwise it was determined to be undeterminable (UND). In parallel, if the results from three or more classifiers belong to immune-related genomic subtype (irGS), namely, SMK, UVL, APB, POL, or MRD, it was classified as irGS, otherwise non-irGS. This tool is available in the GitHub page (<https://github.com/shirota/GS-PRACTICE>).

### Analysis of non-TCGA datasets

#### Pan-Cancer Analysis of Whole Genomes consortium (PCAWG) datasets<sup>27</sup>

Donor-centric phenotype data, consensus coding mutation profiles, allele-specific copy number profiles, RNAseq-based gene expression profiles were obtained from the UCSC Xena<sup>28</sup>. From a total of 2834 cases, those included in the whitelist, with consensus coding mutations available, aged 20 years or older, and with tumor types included in TCGA studies were analyzed (Figure S11A). Subtyping by GS-PRACTICE was performed using the consensus coding mutations in the MAF format as input (Figure S11B). Somatic mutations were retained only when the altered allele count was  $\geq 4$ , the altered allele frequency was  $\geq 2.5\%$ , and the oncoKB<sup>29</sup> annotation was either 'pathogenic' or 'likely pathogenic'. Somatic *BRCA1/2* mutations were checked for their allele-specific copy numbers, and only those with the minor allele copy number equal to zero were retained as significant alterations, as previously reported<sup>15</sup>. The normalized gene expression values, derived from the log2 transformed upper quartile fragments per kilobase of transcript per million mapped reads (FPKM-UQ), were used for analysis. The CYT score<sup>22</sup> and the GEP score<sup>25</sup> were calculated in the same way as TCGA data analysis.

### **Clinical Proteomic Tumor Analysis Consortium (CPTAC) datasets**<sup>30</sup>

Clinical information and somatic mutation profiles in the MAF format were obtained from GDC portal<sup>4</sup>.

### **cBioPortal datasets**<sup>1</sup>

Clinical information and somatic mutation profiles in the MAF format were obtained from the websites (Table S2).

### **National Bioscience Database Center (NBDC) datasets**<sup>31</sup>

We obtained clinical and raw WES data (Table S2) through the application process for NBDC Human Database<sup>31</sup>, calculated somatic mutation profiles in our WES analysis pipeline (see below).

### **Sample selection and definition of response in ICI-treated cohorts**

Collected samples were derived from pairs of the primary tumor and normal blood or tissue, and those collected from metastatic sites different from the primary tumor (lymph nodes, bones, distant internal organs, etc.) were excluded. In addition, collected samples were taken before or during ICI administration, and those with a history of ICI treatment at the time of sample collection were excluded. Most of the cases were evaluated using the RECIST criteria for radiological response or equivalent, where CR/PR was defined as a responder and SD/PD/NE as a non-responder. In some datasets, we could not find a response assessment by such criteria from the articles. In the data of Anagnostou et al.<sup>32</sup>, durable clinical benefit (DCB) was defined as 'complete, partial response or stable disease with a duration >6 months from the time of treatment initiation'. Within their dataset, we defined cases who achieved DCB and had more than 12 months of PFS as responders with the rest labeled as non-responders. For the dataset from Cristescu et al.<sup>25</sup>, we distinguished between responders and non-responders based on the values listed in the figures and tables in the paper, and confirmed that the annotations were consistent with the results of the other figures. As a result, a total of 973 patients from 13 datasets that met the above criteria and had available response information were included in the analysis (Table S3).

### **Sample selection for survival analysis in the ICI-treated cohorts**

We obtained data of Miao et al. from cBioPortal (n = 249), where they analyzed WES data from patients with clinically annotated outcomes to ICI therapy<sup>33</sup>. Five other datasets with available overall survival information, including Snyder et al.<sup>34</sup>, Riaz et al.<sup>35</sup>, Mariathasan et al.<sup>36</sup>, Liu et al.<sup>37</sup>, and Anagnostou et al.<sup>32</sup> were added to the analysis.

### **WES analysis pipeline**

For the raw paired WES data obtained from NBDC, dbGaP and EGA (Table S2, Table S3), somatic mutations were analyzed in the following steps according to the Best Practice Workflows of somatic short variant (SNVs + Indels) discovery published by the Broad institute GATK team<sup>38</sup>, where Genome Analysis Toolkit (GATK) v4.0.12 and Picard v2.20.2 were used. (1) BAM files were converted to FASTQ files using Picard SamToFastq. (2) Low-quality reads and

presumed adapter sequences were removed using TrimGalore<sup>39</sup>. (3) The trimmed reads were aligned to the human reference genome hg38 obtained from the GATK resource bundle using BWA mem (v0.7.17-r1188)<sup>40</sup>. (4) Data preprocessing including marking duplicates, making the panel of normal samples, and estimating contamination was performed using the Picard and GATK tools. (5) Somatic mutation calling including orientation bias filtering was performed using Mutect2. (6) The following parameters were used to filter out variants with low reliability: annotated as "PASS"; "TLOD" greater than 6.3 and 9 for single nucleotide variants and insertions and deletions, respectively; coverage of altered alleles greater than or equal to 5; altered allele frequency greater than or equal to 2.5%. (7) Variant annotation was performed using Funcotator with default setting using data source of v1.7.20200521s to generate MAF format files.

For the dataset from Hellmann et al<sup>41</sup>, only the VCF files after somatic mutation calling were available, so we filtered variants using the same criteria as described above and converted to MAF files for subsequent analysis.

### Validation of the WES analysis pipeline

As reported by Litchfield et al<sup>42</sup>, TMB does not differ significantly depending on the exome capture kits used. For compatibility between TCGA and other datasets, we adopted the Agilent SureSelect Human All Exon V5 capture kit as the common exome regions to be analyzed in our WES analysis pipeline. Comparing the number of missense mutations calculated from cBioPortal<sup>1</sup> with those from our pipeline among the same samples, the Pearson correlation tended to exceed 0.9 in most of the datasets (Figure S20). Similarly, when we compared the number of non-synonymous SNVs in the Cristescu et al paper<sup>25</sup> with those from our pipeline, the Pearson correlation was 0.945 (Figure S20).

### TcellExTRECT score

The BAM files derived from the tumor samples mapped in the above pipeline were used as input to calculate the TcellExTRECT scores<sup>26</sup> in the same way as the TCGA data analysis.

### Statistical analyses

Unless otherwise noted, statistical analyses were performed in Python (3.7.4). The Mann–Whitney U test, chi-square test, and Spearman's rank correlation coefficient test were performed using SciPy (1.6.1). Survival analyses including Kaplan–Meier curve, log-rank test, and Cox proportional hazard regression model were performed using Lifelines (0.25.10) and StatsModels (0.12.2). Machine learning analyses were performed using Scikit-learn (0.24.1). We considered a p-value < 0.05 as being statistically significant. Venn diagrams were depicted using "VennDiagram" (1.6.20) package in R. The Jonckheere-Terpstra test was performed using "clinfun" (1.0.15) package in R. The Passing-Bablok regression was performed using "mcr" (1.2.2) package in R.

### Data and code availability

Controlled access data used in this study were obtained from dbGaP, EGA, and NBDC with access permissions according to the respective required procedures (Table S2 and S3). The processed data and codes to reproduce the results of this work are available on the GitHub page ([https://github.com/shirotak/pancancer\\_MutSig\\_ICI](https://github.com/shirotak/pancancer_MutSig_ICI)). Other codes for preprocessing or restricted-access data are available from the corresponding author upon reasonable request.

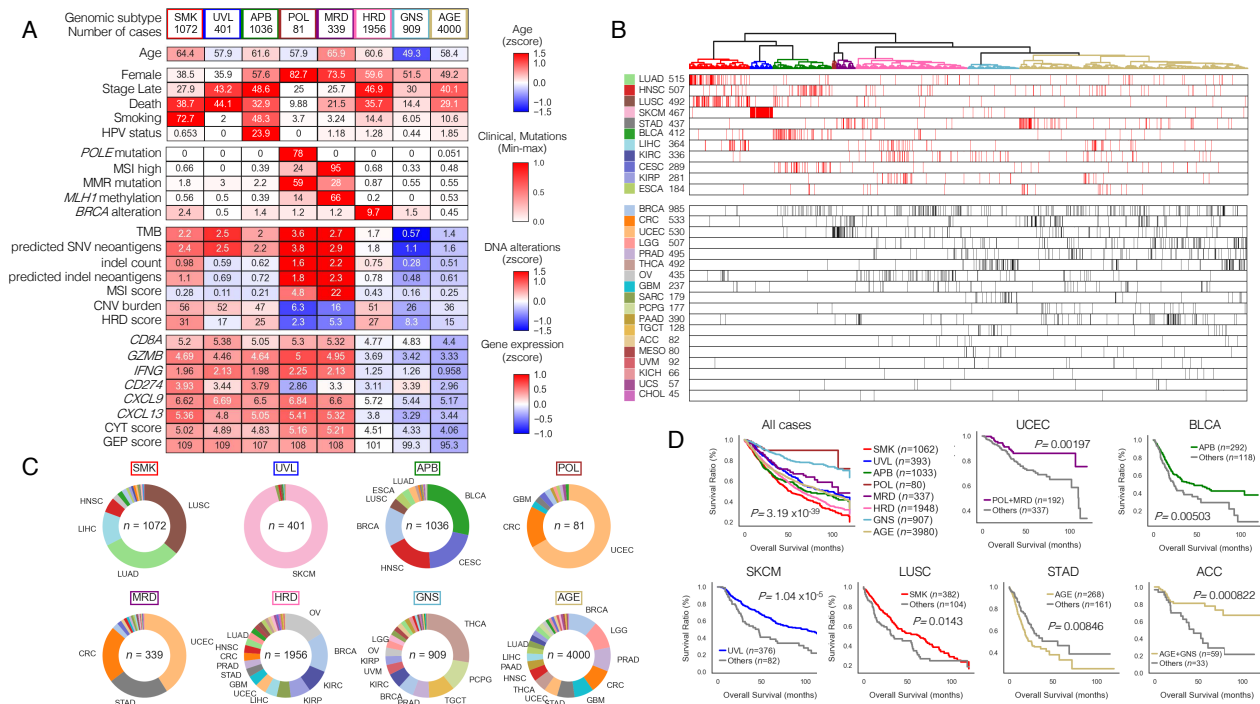

**Figure S1. Characteristics of the eight tumor genomic subtypes derived from TCGA solid tumors (N=9794)**

- A) Clinical and genomic information for each subtype, related to Figure 1A. The values are either the average of the Z-scores or the frequency for each subtype, and the values are displayed as a heat map. Predicted SNV and indel neoantigens counts by netMHCpan were significantly correlated with TMB and indel counts, respectively. CNV burdens and HRD scores were also correlated with each other. *CD274*, unlike *CXCL9* and *CXCL13*, did not show definitively higher expression specifically in irGS. This appears to be consistent with a previous report<sup>42</sup> that *CD274* mRNA expression was not strongly associated with ICI reactivity in pan-cancer analysis.
- B) Relationship between the distribution of cancer types based on the hierarchical clustering and the FDA approval for ICI therapy. Each case is represented by a red bar (with FDA approval for ICI) or a black bar (without FDA approval for ICI).
- C) Type of cancer and number of samples per subtype. The color of each cancer type matches the color shown in B.
- D) Differences in survival outcomes between subtypes. When all cases were compared among the eight subtypes, the prognosis was different. Furthermore, for the cancer types shown here, the prognosis was significantly different by subtype in the analysis of each cancer type. P-value is based on log-rank test.

ACC, Adrenocortical carcinoma; BLCA, Bladder urothelial carcinoma; BRCA, Breast invasive carcinoma; CESC, Cervical squamous cell carcinoma and endocervical adenocarcinoma; CHOL, Cholangiocarcinoma; CRC, Colorectal adenocarcinoma; ESCA, Esophageal carcinoma; GBM, Glioblastoma multiforme; HNSC, Head and neck squamous cell carcinoma; KICH, Kidney chromophobe; KIRC, Kidney renal clear cell carcinoma; KIRP, Kidney renal papillary cell carcinoma; LGG, Brain lower grade glioma; LIHC, Liver hepatocellular carcinoma; LUAD, Lung adenocarcinoma; LUSC, Lung squamous cell carcinoma; MESO, Mesothelioma; OV, Ovarian serous cystadenocarcinoma; PAAD, Pancreatic adenocarcinoma; PCPG, Pheochromocytoma and paraganglioma; PRAD, Prostate adenocarcinoma; SARC, Sarcoma; SKCM, Skin cutaneous melanoma; STAD, Stomach adenocarcinoma; TGCT, Testicular germ cell tumors; THCA, Thyroid carcinoma; UCEC, Uterine corpus endometrial carcinoma; UCS, Uterine carcinosarcoma; UVM, Uveal melanoma.

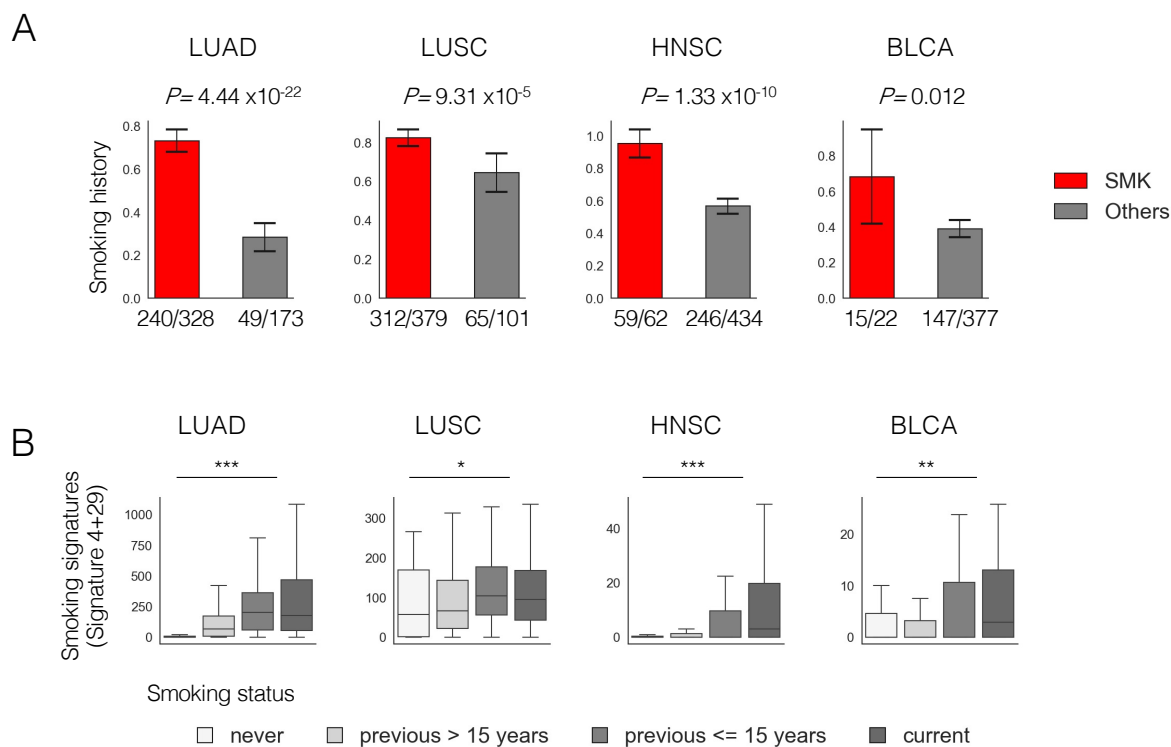

### Figure S2. Features of SMOKING (SMK) subtype (n=1072)

The association with smoking habits was investigated in LUAD, LUSC, HNSC and BLCA where clinical information on smoking was available.

- A) SMK cases had a higher frequency of smoking history (current smoking and smoking within 15 years) than the other groups.
- B) The sum of the contributions of signature 4 and 29, which are known to be related to smoking exposure and tobacco chewing habit, were positively correlated with smoking habit. (Jonckheere-Terpstra test, \*\*\*  $P < 1 \times 10^{-4}$ , \*\*  $P < 0.01$ , \*,  $P < 0.05$ )

BLCA, Bladder urothelial carcinoma; HNSC, Head and neck squamous cell carcinoma; LUAD, Lung adenocarcinoma; LUSC, Lung squamous cell carcinoma

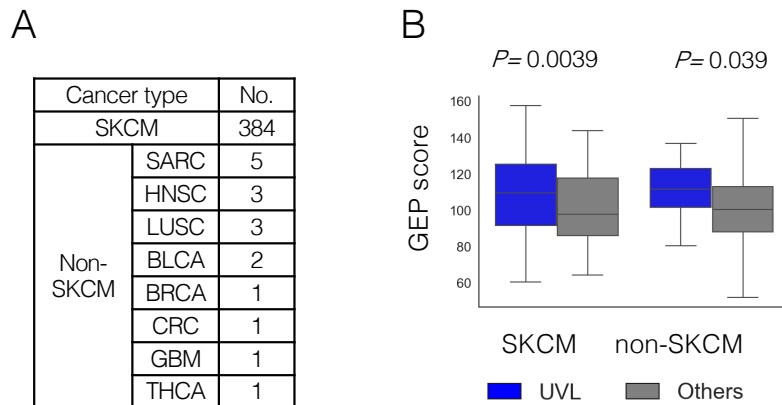

**Figure S3. Features of ULTRAVIOLET LIGHT (UVL) subtype (n=401)**

A) Cancer type of UVL subtype. 95.8% were SKCM.

B) Excluding SKCM, UVL tumors showed higher GEP score than the other subtypes ( $P=0.033$ , Mann-Whitney U test).

These results suggest that, although rare in cancers other than SKCM, there are some tumors that exhibit UVL subtype and may have a high tumor immunogenicity.

BLCA, Bladder urothelial carcinoma; BRCA, Breast invasive carcinoma; CRC, Colorectal adenocarcinoma; HNSC, Head and neck squamous cell carcinoma; LUSC, Lung squamous cell carcinoma; SARC, Sarcoma; THCA, Thyroid carcinoma



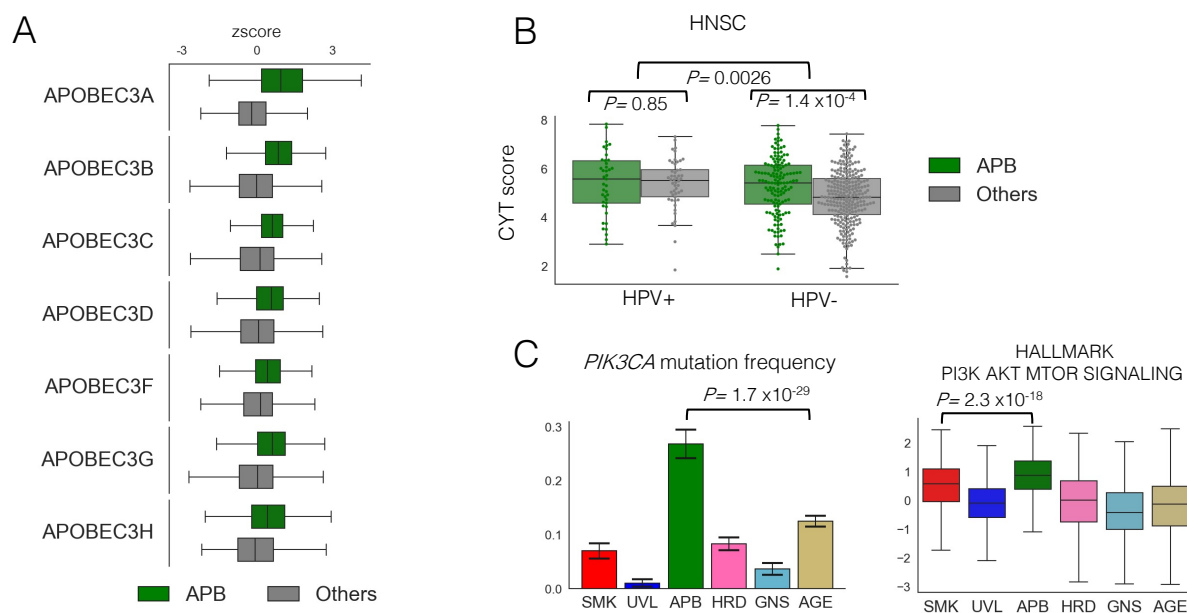

**Figure S4. Features of APOBEC (APB) subtype (n=1036)**

- A) The expression of APOBEC3 family genes was significantly higher in APB subtype (all P-values  $< 2.2 \times 10^{-19}$ , Mann-Whitney test).
- B) HPV infection was associated with higher immune response in TCGA-HNSC (n=507). Besides, even in HPV-negative tumors, APOBEC subtype showed a higher immune response than the other groups.
- C) (Left) The *PIK3CA* mutation rate was the highest (26.4%) in the APB subtype excluding hyper mutator subtype (MRD and POL). Chi-square test  $P=1.7 \times 10^{-29}$ . (Right), PI3K\_AKT\_MTOR pathway score was the highest in the APB subtype. Mann-Whitney  $P=2.3 \times 10^{-18}$ . These results are consistent with the previously reported association between *PIK3CA* mutation and APOBEC-mediated cytosine deamination<sup>43</sup>.

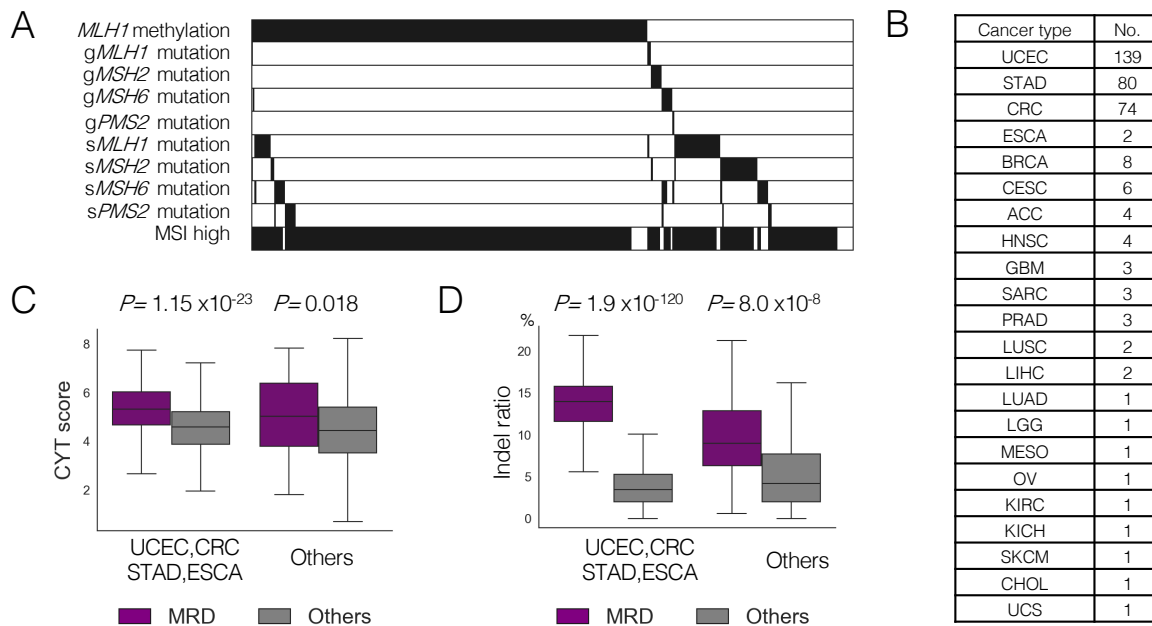

**Figure S5. Features of MISMATCH REPAIR DEFICIENCY (MRD) subtype (n=339)**

- A) 86.4% had MMR gene alterations (somatic and germline mutation in *MLH1*, *MSH2*, *MSH6*, and *PMS2*, and *MLH1* methylation).
- B) Cancer types of MRD subtype.
- C) Excluding cancer types with relatively high frequency of MSI-high tumors (UCEC, CRC, STAD, ESCA), immune-related gene expression scores were still higher in MRD subtype than the others ( $P=0.016$ , Man-Whitney U test)
- D) Excluding cancer types with relatively high frequency of MSI-high tumors (UCEC, CRC, STAD, ESCA), the ratio of the total indel count to the total number of detected mutations (indel ratio) was still higher in MRD subtype than the others ( $P=4.0 \times 10^{-8}$ , Man-Whitney U test)

ACC, Adrenocortical carcinoma; BRCA, Breast invasive carcinoma; CESC, Cervical squamous cell carcinoma and endocervical adenocarcinoma; CHOL, Cholangiocarcinoma; CRC, Colorectal adenocarcinoma; ESCA, Esophageal carcinoma; GBM, Glioblastoma multiforme; HNSC, Head and neck squamous cell carcinoma; KICH, Kidney chromophobe; KIRC, Kidney renal clear cell carcinoma; LGG, Brain lower grade glioma; LIHC, Liver hepatocellular carcinoma; LUAD, Lung adenocarcinoma; LUSC, Lung squamous cell carcinoma; MESO, Mesothelioma; OV, Ovarian serous cystadenocarcinoma; PRAD, Prostate adenocarcinoma; SARC, Sarcoma; SKCM, Skin cutaneous melanoma; STAD, Stomach adenocarcinoma; UCEC, Uterine corpus endometrial carcinoma; UCS, Uterine carcinosarcoma

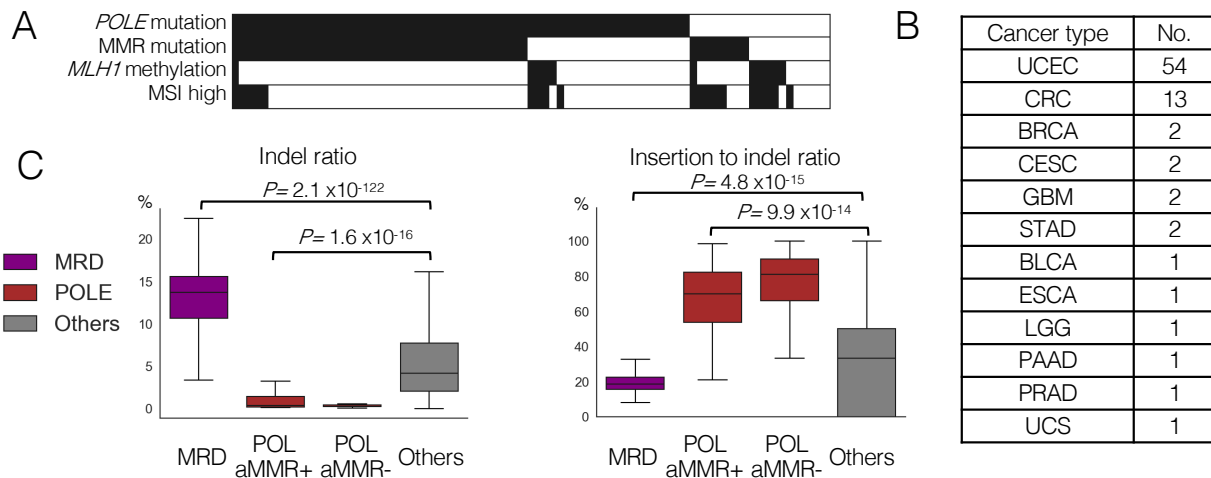

### Figure S6. Features of *POLE* (POL) subtype (n=81)

- A) Somatic *POLE* mutation was observed in 76.5% of POL subtype, and MMR-gene mutation (somatic and germline mutation in *MLH1*, *MSH2*, *MSH6*, and *PMS2*) was observed in 59.3% of POL subtype.
- B) Cancer types of POL subtype
- C) POL subtype, both with and without MMR mutation, showed lower ratio of the total indel count to the total detected mutations (indel ratio) (left) and higher ratio of the total insertion count to the total indel count (insertion to indel ratio) (right) than other subtypes, in contrast to MRD subtype. These data indicate that most tumors with concurrent *POLE* and MMR-gene mutations have acquired *POLE* mutation first, as previously reported<sup>44</sup>, and thus have the *POLE* mutation-dominant underlying mutational processes.

BLCA, Bladder urothelial carcinoma; BRCA, Breast invasive carcinoma; CESC, Cervical squamous cell carcinoma and endocervical adenocarcinoma; CRC, Colorectal adenocarcinoma; ESCA, Esophageal carcinoma; GBM, Glioblastoma multiforme; LGG, Brain lower grade glioma; PAAD, Pancreatic adenocarcinoma; PRAD, Prostate adenocarcinoma; UCEC, Uterine corpus endometrial carcinoma; UCS, Uterine carcinosarcoma

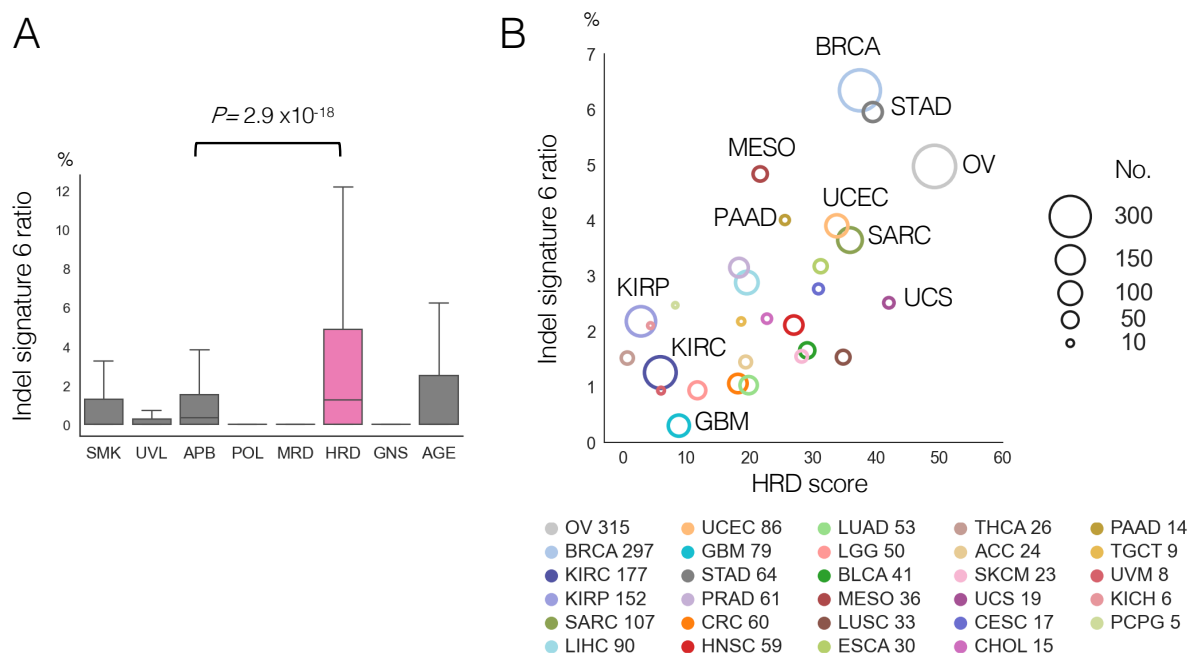

**Figure S7. Features of HOMOLOGOUS RECOMBINATION DEFICIENCY (HRD) subtype (n=1956)**

- A) The ratio of contribution values of indel signature 6 to the number of all detected mutations (indel signature 6 ratio), a ratio related to homologous recombination deficiency, was higher in the HRD subtype than in other subtypes
- B) Association between mean HRD scores (x-axis) and indel signature 6 ratios (y-axis) per cancer type calculated in tumors classified into HRD subtype. These two values were simultaneously high in cancer types such as OV, BRCA, SARC, UCEC, and STAD, which are known to include a certain proportion of HRD phenotypes in previous reports<sup>15</sup>. On the other hand, cancer types such as KIRP, KIRC, and GBM showed low values in both, suggesting that the HRD subtype may include tumors which do not harbor HRD phenotype.

ACC, Adrenocortical carcinoma; BLCA, Bladder urothelial carcinoma; BRCA, Breast invasive carcinoma; CESC, Cervical squamous cell carcinoma and endocervical adenocarcinoma; CHOL, Cholangiocarcinoma; CRC, Colorectal adenocarcinoma; ESCA, Esophageal carcinoma; GBM, Glioblastoma multiforme; HNSC, Head and neck squamous cell carcinoma; KICH, Kidney chromophobe; KIRC, Kidney renal clear cell carcinoma; KIRP, Kidney renal papillary cell carcinoma; LGG, Brain lower grade glioma; LIHC, Liver hepatocellular carcinoma; LUAD, Lung adenocarcinoma; LUSC, Lung squamous cell carcinoma; MESO, Mesothelioma; OV, Ovarian serous cystadenocarcinoma; PAAD, Pancreatic adenocarcinoma; PCPG, Pheochromocytoma and paraganglioma; PRAD, Prostate adenocarcinoma; SARC, Sarcoma; SKCM, Skin cutaneous melanoma; STAD, Stomach adenocarcinoma; TGCT, Testicular germ cell tumors; THCA, Thyroid carcinoma; UCEC, Uterine corpus endometrial carcinoma; UCS, Uterine carcinosarcoma; UVM, Uveal melanoma.

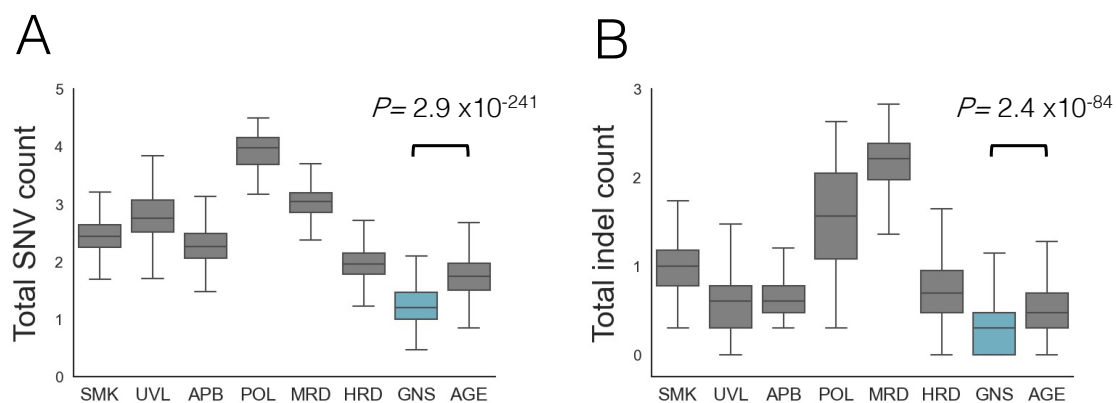

**Figure S8. Features of GENOMICALLY STABLE (GNS) subtype (n=909)**

Not only the total number of SNVs (A), but also that of insertions and deletions (B) were the lowest in GNS among all subtypes.

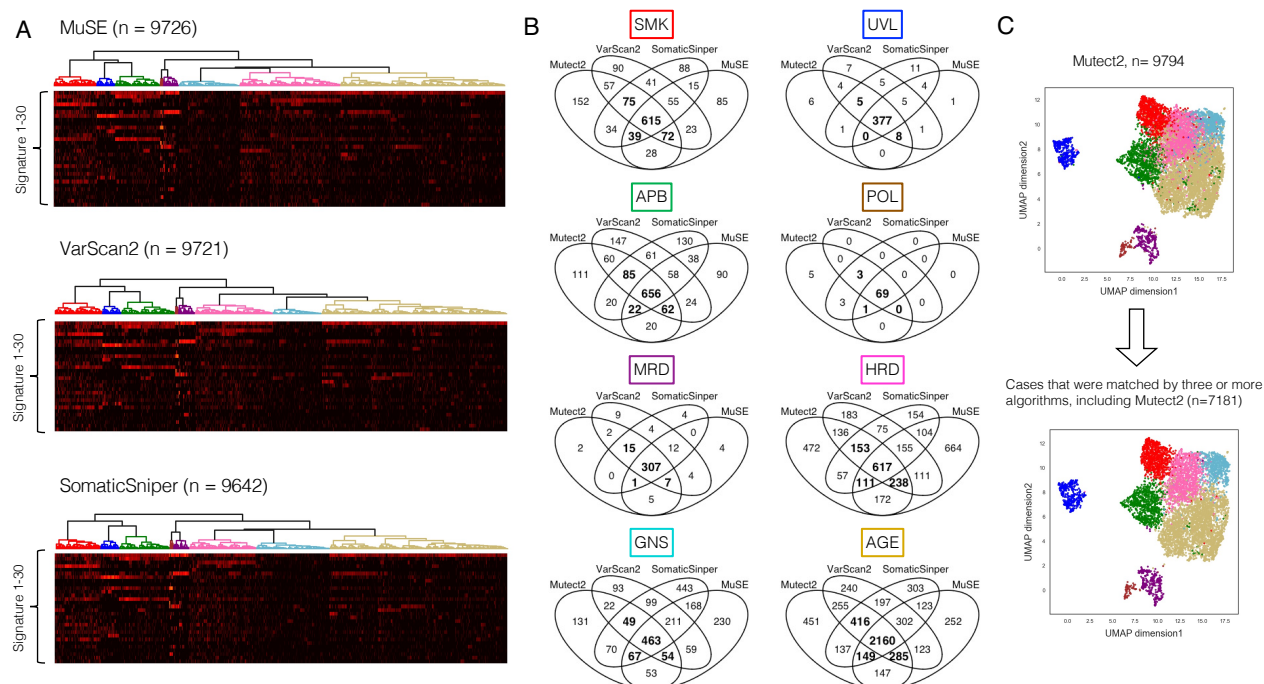

**Figure S9. Consistency of clustering results from different variant callers**

A) The results of hierarchical clustering based on the somatic mutation profiles derived from MuSE (upper), VarScan2 (middle), and SomaticSniper (lower).

Using these methods of annotation, eight genomic subtypes were created, as in the case using Mutect2.

B) Venn diagrams showing the overlapping of results from the four variant callers per subtype. GNS, HRD, and AGE subtypes showed relatively low consistency. To extract tumors typical for each subtype, cases that were matched by three or more algorithms, including Mutect2, were used for the next analysis (numbers in bold).

C) The UMAP clustering shows that the sample selection described in B reduces the number of cases in the border region of the subtype heatmap.

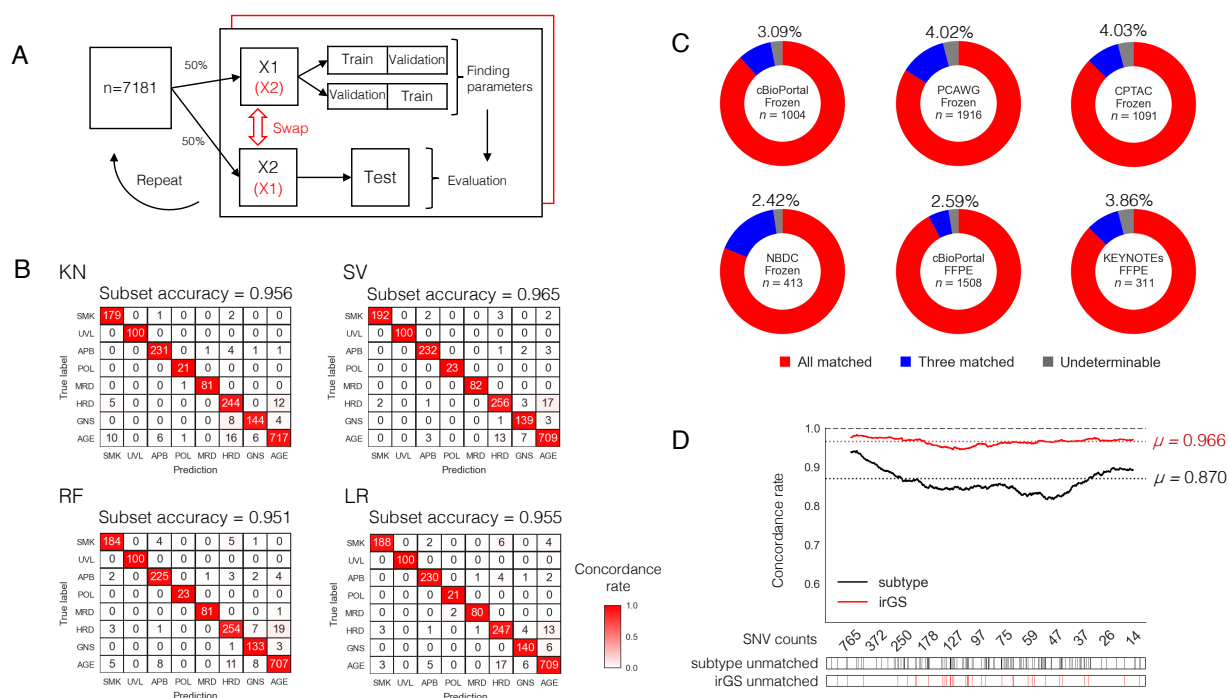

**Figure S10. Developing classifiers through machine learning algorithms**

- A) Double cross-validation and hyperparameter tuning. First, the selected 7181 TCGA samples were divided into two parts, X1 and X2. Second, parameters were calculated using X1 by two-fold cross-validation, and those parameters were evaluated using X2 as test data. Third, X1 and X2 were swapped, and the same calculations were performed. These processes were repeated 100-1000 times to determine the optimal parameters.
- B) Confusion matrices showing the classification performance on test data for the four classifiers: K-nearest neighbor (KN), support vector machine (SV), random forest (RF), and logistic regression (LR). Results using 75% of all cases for training and 25% for testing are shown. All showed more than 95% subset accuracy (exact match ratio).
- C) Consistency of subtyping results between the four classifiers per data group. When three or more of the four classifier results do not match, the sample is annotated as "undeterminable". Undeterminable samples were found in approximately 2-4% in the studied data groups, and there was no significant difference in the proportion between FFPE samples and frozen tissue origins or between data groups
- D) Association of TMB with multi-classifier concordance rates for the eight genomic subtypes or for irGS/non-irGS classification. To derive concordance rates, all samples examined in C (n=6243) were arranged by the total number of SNVs per sample, and subjected to a moving average analysis per 500 samples. The black and red solid lines represent moving averages of tumor subtypes and irGS/non-irGS concordance rates, respectively. Black and red dotted lines indicate the respective average rates over all samples (87.0% and 96.6%). The concordance rate for subtypes was the lowest around 50 SNVs per sample, at about 82%. The concordance rate for irGS/non-irGS classification remained above 95% even when per-classifier discrepancies were present.

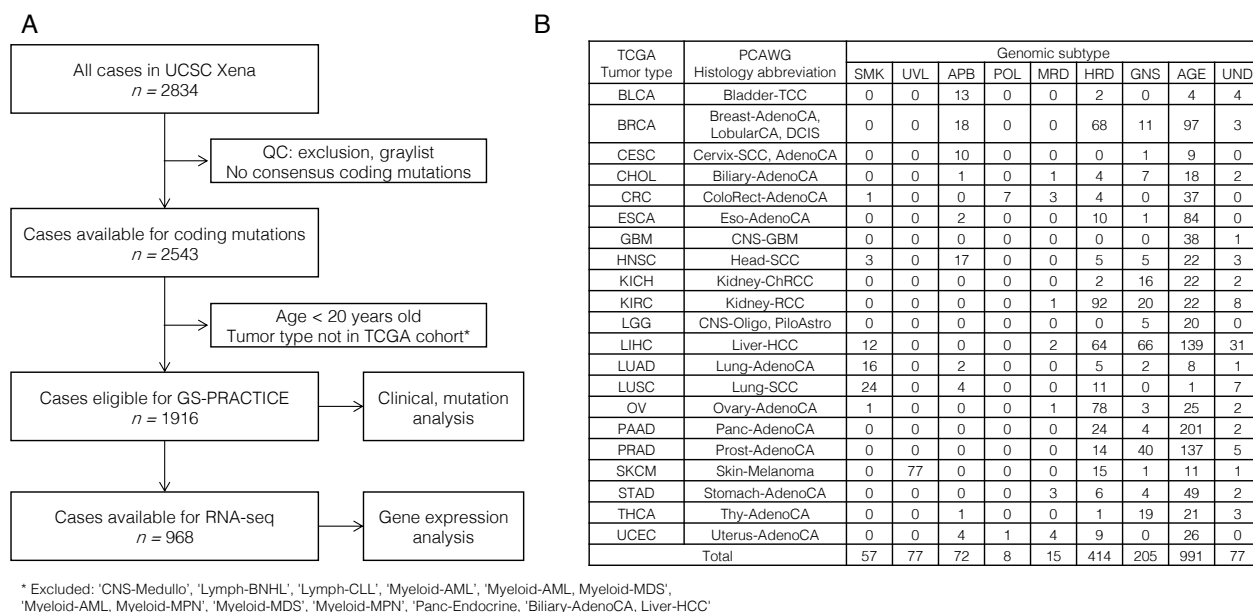

**Figure S11. Tumor subtyping by GS-PRACTICE in the PCAWG datasets**

**A) Sample selection.**

From a total of 2834 cases, those included in the whitelist, with consensus coding mutations available, aged 20 years or older, and with tumor types included in TCGA studies were analyzed (n = 1916).

**B) Distribution of the samples by tumor genomic subtype and by cancer type**

PCAWG, Pan-Cancer Analysis of Whole Genomes consortium



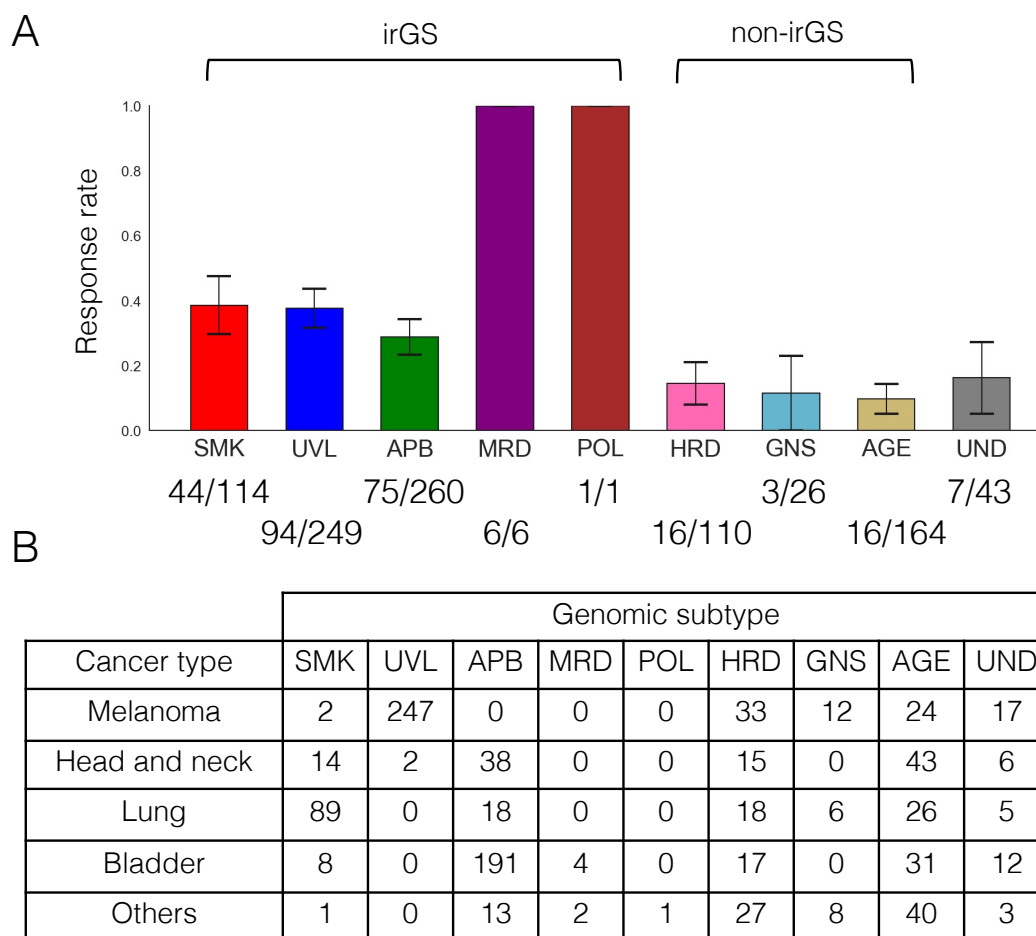

**Figure S12. Relationship between tumor genomic subtype, response rate and cancer type in the ICI-treated cohort**

- A) ICI response rate for each tumor genomic subtype. Subtypes included in irGS (SMK, UVL, APB, MRD, POL) showed a higher response rate than subtypes included in non-irGS (HRD, GNS, AGE).
- B) Distribution of the samples by tumor genomic subtype and by cancer type.

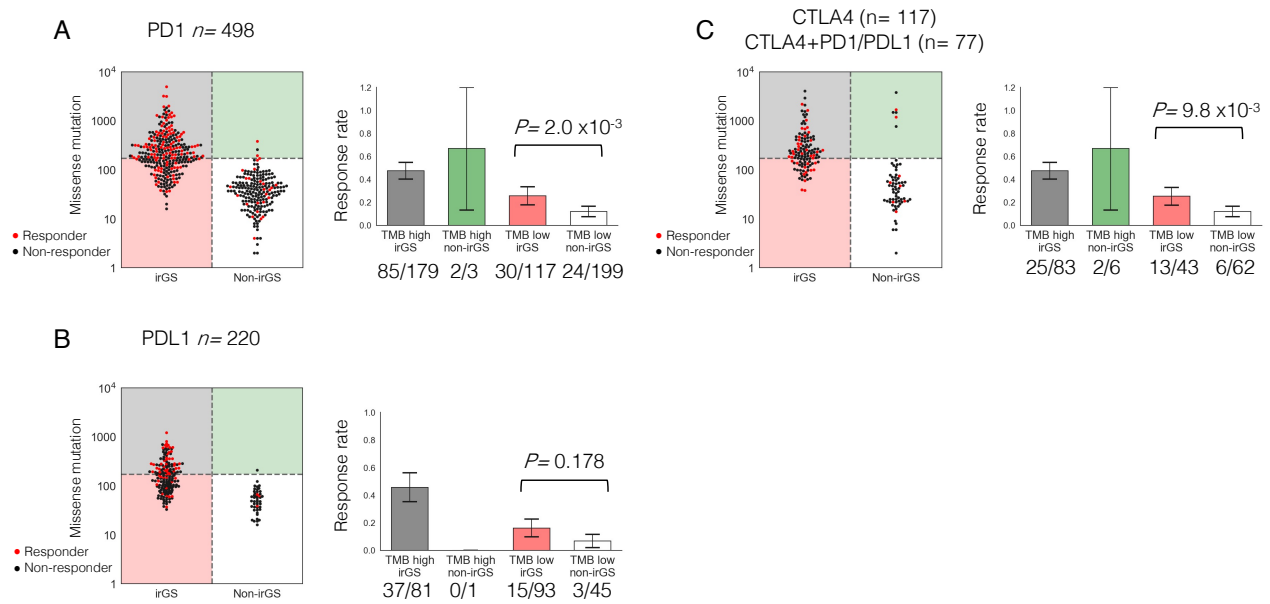

**Figure S13. Studies examined by type of drug**

A) Study in the cases treated with anti-PD1 antibody.

B) Study in the cases treated with anti-PDL1 antibody.

C) Study in the cases treated with anti-CTLA antibody or anti-CTLA antibody plus other ICIs.

In all studies, ICI response rate tended to be higher in irGS compared to non-irGS within TMB low cases.

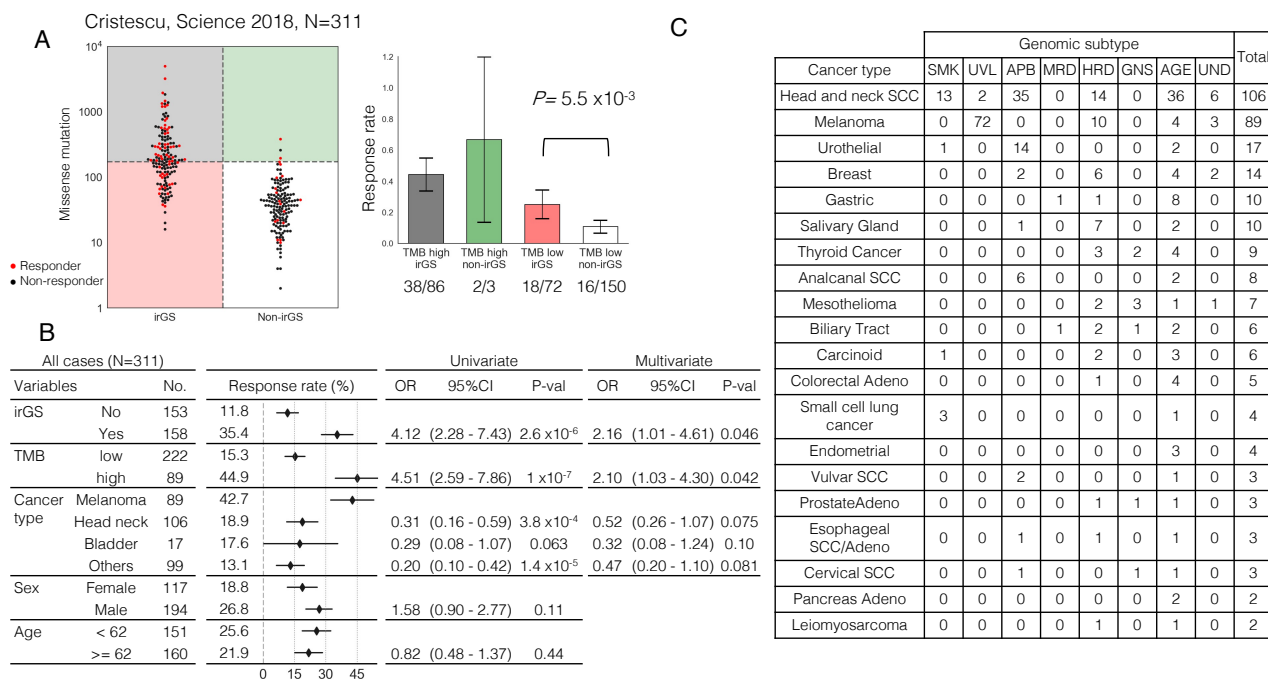

**Figure S14. Study in the dataset from the KEYNOTE trials, which were prospective cohort studies of patients treated with solely pembrolizumab (n=311)**

- A) Association between TMB and ICI response per sample divided by irGS status (left) and comparison of ICI response rate in the four groups stratified by irGS and TMB status (right). irGS showed a significantly higher response rate than non-irGS within the sample classified as TMB low.
- B) Univariate and multivariate logistic regression analysis for ICI response. irGS status was significantly associated with the ICI response after adjusting by TMB status and cancer type.
- C) Distribution of the samples by tumor genomic subtype and by cancer type. Although the KEYNOTE trials excluded patients with clinically diagnosed MSI high tumors at enrollment, two tumors from the cohort (one each with gastric cancer and biliary tract cancer) were classified as MRD subtype, and both of them responded to ICI.

irGS, immune-reactive genomic subtype; TMB, Tumor mutational burden; OR, Odds ratio; CI, confidence interval; SCC, squamous cell carcinoma

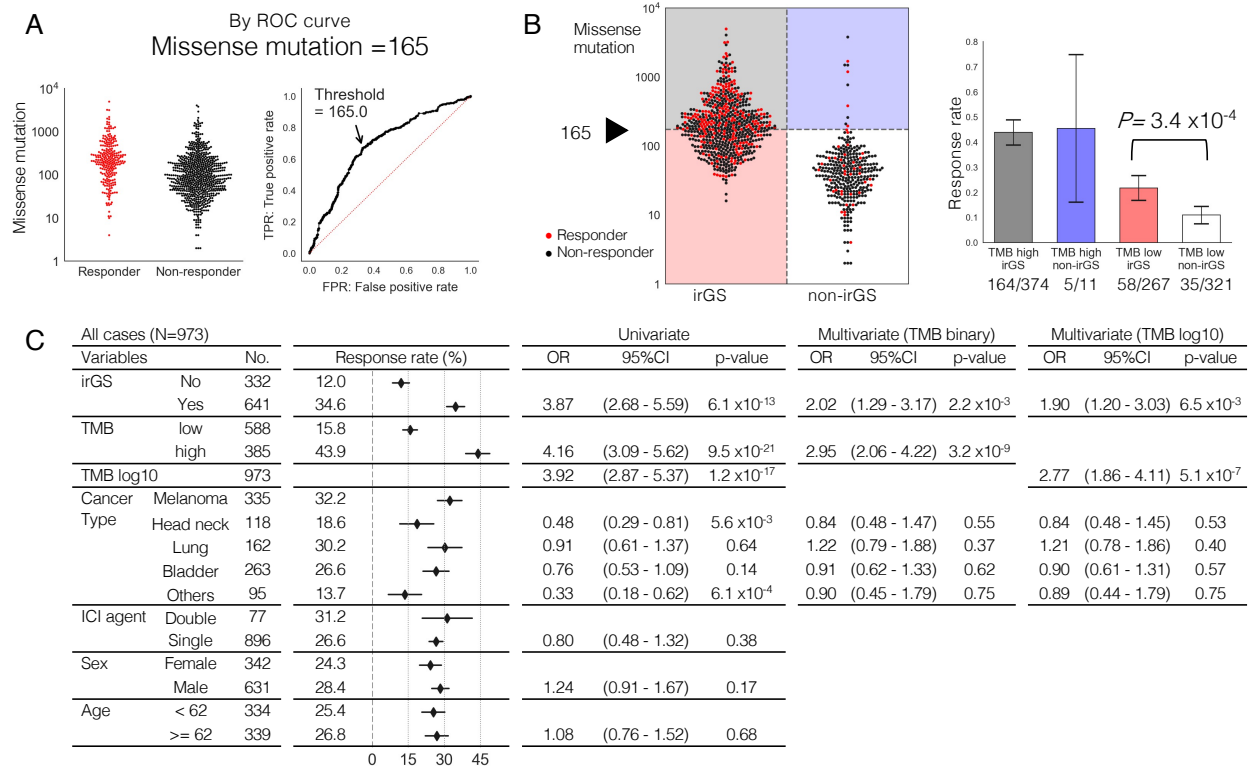

**Figure S15. Studies using the cohorts' optimal TMB cutoff or logarithmic TMB as a continuous value**

- A) The cohort's optimal TMB cutoff determined by the ROC curve and the Youden index for objective responses in the whole cohort (N=973) was 165 missense mutations, which was close to 173, the value calculated Figure3B.
- B) Association between TMB and ICI response per sample divided by irGS status (left) and comparison of ICI response rate in the four groups stratified by irGS and TMB status (right). irGS showed a significantly higher response rate than non-irGS within the sample classified as TMB low.
- C) Univariate and multivariate logistic regression analysis for ICI response in the validation cohort (N=973). irGS status was significantly associated with the ICI response after adjusting by TMB status, either as a binary or continuous value, in addition to cancer type.

irGS, immune-reactive genomic subtype; TMB, Tumor mutational burden; OR, Odds ratio; CI, confidence interval

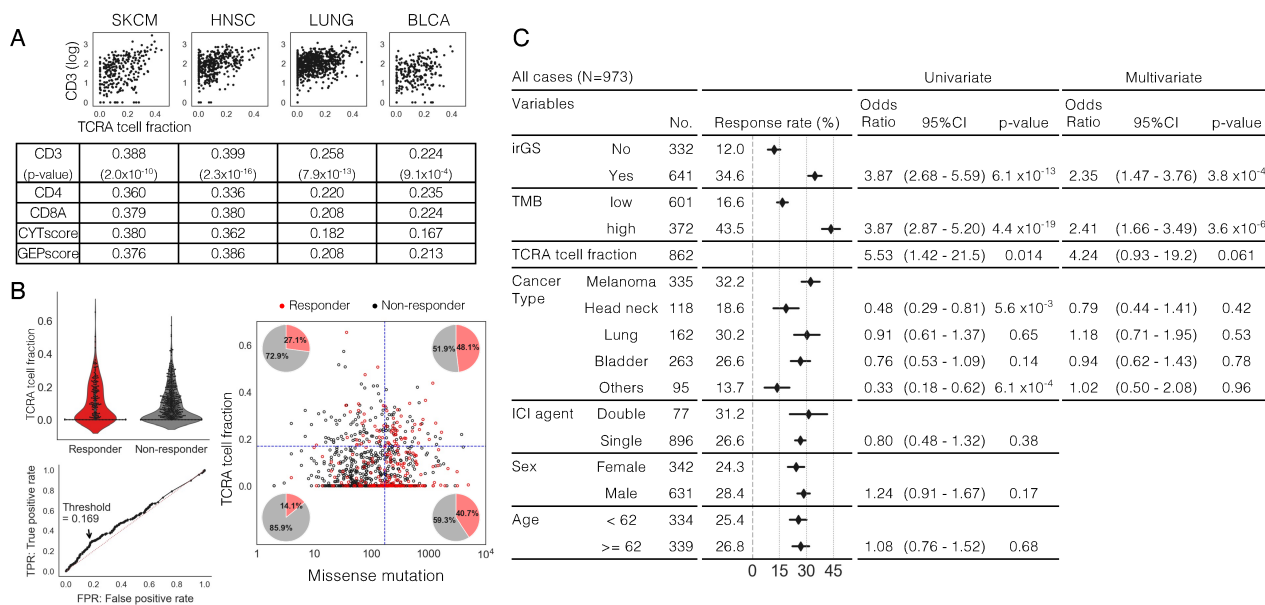

### FigureS16. Study using TcellExtRECT score

- A) Spearman correlations between the TCRA tcell fraction score, calculated by TcellExtRECT<sup>26</sup>, versus T-cell related gene expression scores for each cancer type in TCGA data. CD3 expression levels were calculated as the geometric mean of CD3D, CD3E, and CD3G expression levels. These data indicate that the score can certainly reflect the immune cell infiltration in the tumor.
- B) Associations between ICI response, TCRA tcell fraction, and tumor mutational burden in the validation cohort. The TCRA tcell fraction score was successfully calculated in 862 samples. We calculated the optimal cutoff of the score for ICI response (=0.169), and validated that the score correlated with ICI response independently of tumor mutational burden.
- C) Univariate and multivariate logistic regression analysis for ICI response in the validation cohort with the TCRA tcell fraction score as a covariate. irGS status was significantly associated with the ICI response after adjusting by TMB status, TCRA tcell fraction, and cancer type.

irGS, immune-reactive genomic subtype; TMB, Tumor mutational burden; OR, Odds ratio; CI, confidence interval

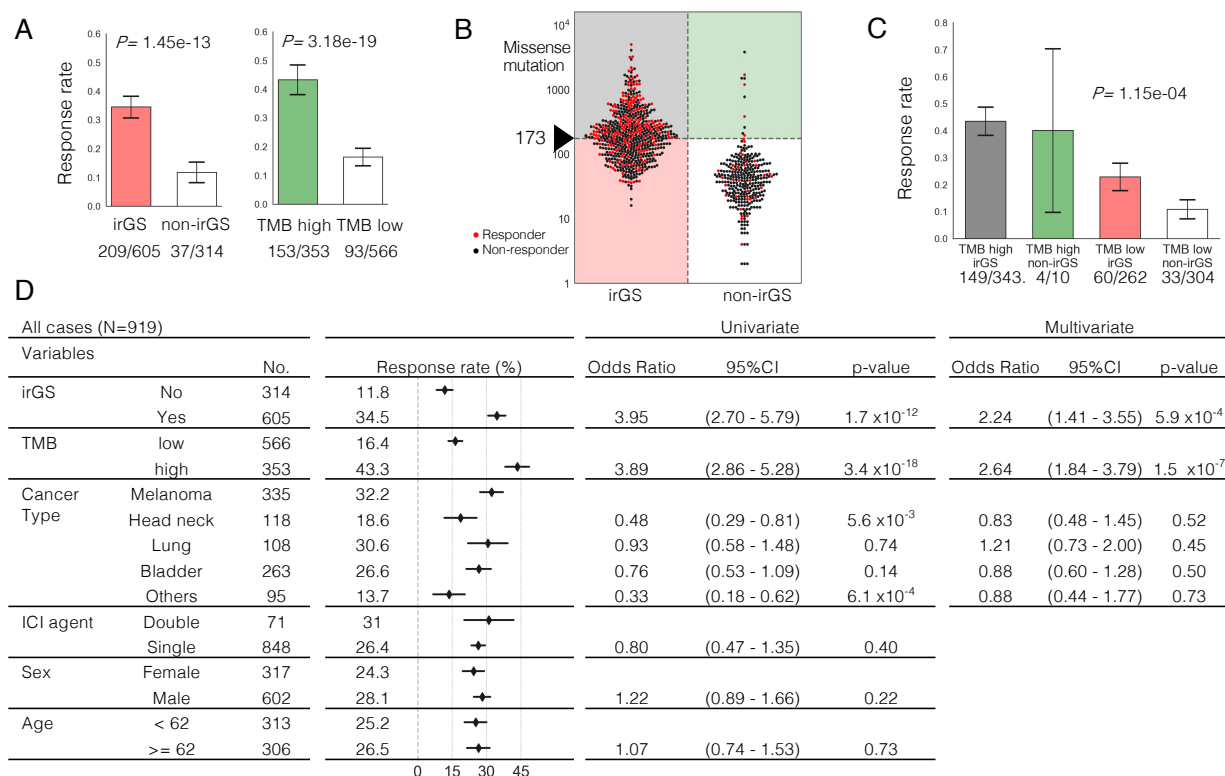

### Figure S17. Study excluding the Anagnostou et al. dataset

As the data of Anagnostou et al. differs from other datasets in the method used to evaluate response (see Supplementary Methods), a re-analysis was undertaken after excluding the data of Anagnostou et al..

- A)** ICI response rate was significantly higher in irGS tumors than non-irGS (left), as well as in TMB high tumors than TMB low (right).
- B)** Association between distribution of TMB and ICI response per sample divided by irGS status. Red dots indicate responders, and black dots indicate non-responders.
- C)** Comparison of ICI response rates in the four groups stratified by irGS and TMB status. irGS tumors had a significantly higher response rate than non-irGS within the samples classified as TMB low.
- D)** Univariate and multivariate logistic regression analysis for ICI response. irGS status was significantly associated with the ICI response after adjusting by TMB status and cancer type.

irGS, immune-reactive genomic subtype; TMB, Tumor mutational burden; OR, Odds ratio; CI, confidence interval; SCC, squamous cell carcinoma

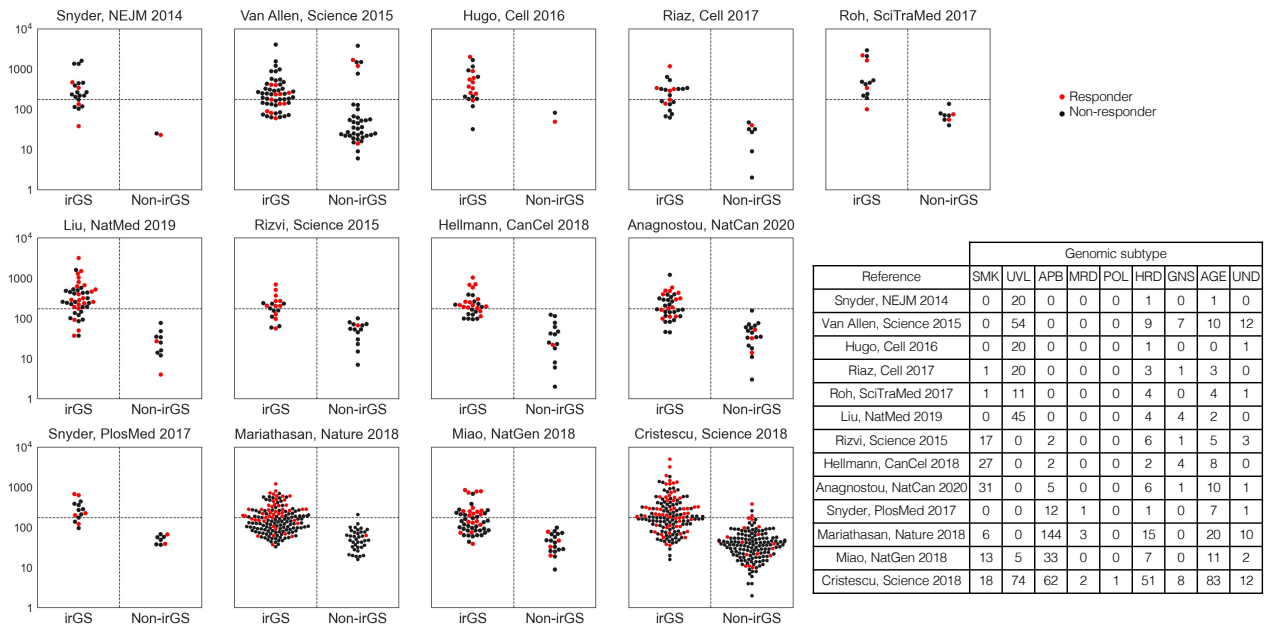

**Figure S18. Association between TMB and ICI response divided by irGS status per dataset**

The right table indicates the distribution of samples for each subtype per dataset. See also Table S3.

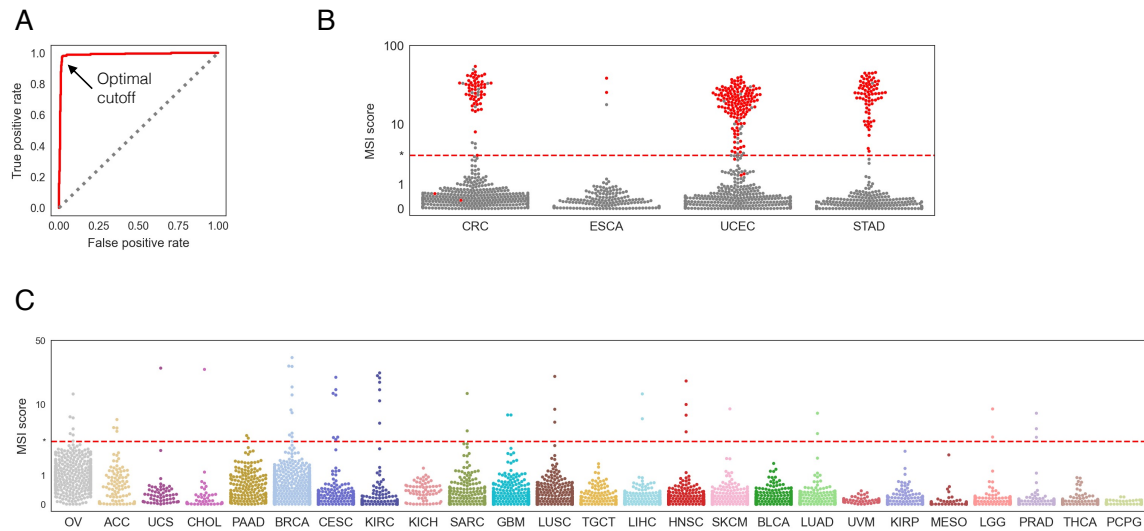

### Figure S19. Determination of MSI-high cases using MSIsensor

- A,B) Optimal cutoff of MSI score to discriminate cases with MSI-high annotations was calculated using ROC curve and Youden index from the datasets of CRC, ESCA, STAD and UCEC.
- C) The relationship between MSI score and the cutoff value in cancer types other than the four above. Cases exceeding the cutoff were annotated as MSI high.



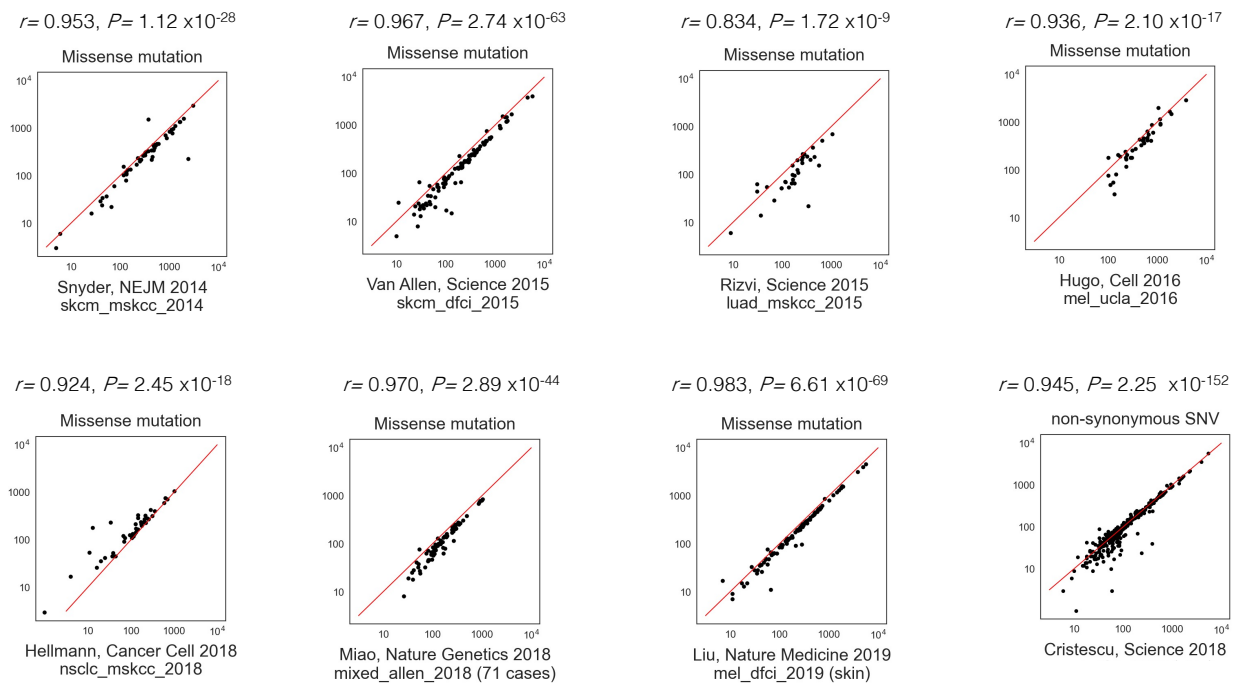

**Figure S20. Comparison of the number of missense mutations or non-synonymous SNVs from our WES pipeline and previously published data**

The red line represents a straight line with slope 1 reaching the zero point. The r value and p value at the top of each panel were calculated using the Pearson's correlation. Most of the datasets have Pearson correlations greater than 0.9.

## References

1. Cerami E et al. The cBio cancer genomics portal: an open platform for exploring multidimensional cancer genomics data. *Cancer Discov.* 2012 May;2(5):401-4. doi: 10.1158/2159-8290.CD-12-0095.
2. Broad GDAC Firebrowse. Available at: <https://gdac.broadinstitute.org/>
3. Cibulskis K et al. Sensitive detection of somatic point mutations in impure and heterogeneous cancer samples. *Nat Biotechnol.* 2013 Mar;31(3):213-9. doi: 10.1038/nbt.2514. Epub 2013 Feb 10.
4. Genomic Data Commons Data Portal. Available at: <https://portal.gdc.cancer.gov/>
5. Vaddepally RK et al. Review of Indications of FDA-Approved Immune Checkpoint Inhibitors per NCCN Guidelines with the Level of Evidence. *Cancers (Basel).* 2020 Mar 20;12(3):738. doi: 10.3390/cancers12030738.
6. Yarchoan M et al. Tumor Mutational Burden and Response Rate to PD-1 Inhibition. *N Engl J Med.* 2017 Dec 21;377(25):2500-2501. doi: 10.1056/NEJMc1713444.
7. Yarchoan M et al. PD-L1 expression and tumor mutational burden are independent biomarkers in most cancers. *JCI Insight.* 2019 Mar 21;4(6):e126908. doi: 10.1172/jci.insight.126908. eCollection 2019 Mar 21.
8. Gómez-Raposo C et al. Immune checkpoint inhibitors in endometrial cancer. *Crit Rev Oncol Hematol.* 2021 May;161:103306. doi: 10.1016/j.critrevonc.2021.103306. Epub 2021 Apr 8.
9. Blokzijl F et al. MutationalPatterns: comprehensive genome-wide analysis of mutational processes. *Genome Med.* 2018 Apr 25;10(1):33. doi: 10.1186/s13073-018-0539-0.
10. Tate JGet al. COSMIC: the Catalogue Of Somatic Mutations In Cancer. *Nucleic Acids Res.* 2019 Jan 8;47(D1):D941-D947. doi: 10.1093/nar/gky1015.
11. Koboldt DC et al. VarScan 2: somatic mutation and copy number alteration discovery in cancer by exome sequencing. *Genome Res.* 2012 Mar;22(3):568-76. doi: 10.1101/gr.129684.111. Epub 2012 Feb 2.
12. Fan Y et al. MuSE: accounting for tumor heterogeneity using a sample-specific error model improves sensitivity and specificity in mutation calling from sequencing data. *Genome Biol.* 2016 Aug 24;17(1):178. doi: 10.1186/s13059-016-1029-6.
13. Larson DE et al. SomaticSniper: identification of somatic point mutations in whole genome sequencing data. *Bioinformatics.* 2012 Feb 1;28(3):311-7. doi: 10.1093/bioinformatics/btr665. Epub 2011 Dec 6.
14. Huang KL et al. Pathogenic Germline Variants in 10,389 Adult Cancers. *Cell.* 2018 Apr 5;173(2):355-370.e14. doi: 10.1016/j.cell.2018.03.039.
15. Takamatsu S et al. Utility of Homologous Recombination Deficiency Biomarkers Across Cancer Types. *JCO Precis Oncol.* 2022 May;6:e2200085. doi: 10.1200/PO.22.00085.
16. Knijnenburg TA et al. Genomic and Molecular Landscape of DNA Damage Repair Deficiency across The Cancer Genome Atlas. *Cell Rep.* 2018 Apr 3;23(1):239-254.e6. doi: 10.1016/j.celrep.2018.03.076.
17. Alexandrov LB et al. The repertoire of mutational signatures in human cancer. *Nature.* 2020 Feb;578(7793):94-101. doi: 10.1038/s41586-020-1943-3. Epub 2020 Feb 5
18. Hübschmann D et al. Analysis of mutational signatures with yet another package for signature analysis. *Genes Chromosomes Cancer.* 2021 May;60(5):314-331. doi: 10.1002/gcc.22918. Epub 2020 Dec 31.
19. Niu B et al. MSIsensor: microsatellite instability detection using paired tumor-normal sequence data. *Bioinformatics.* 2014 Apr 1;30(7):1015-6. doi: 10.1093/bioinformatics/btt755. Epub 2013 Dec 25.
20. Jurtz V et al. NetMHCpan-4.0: Improved Peptide-MHC Class I Interaction Predictions Integrating Eluted Ligand and Peptide Binding Affinity Data. *J Immunol.* 2017 Nov 1;199(9):3360-3368. doi: 10.4049/jimmunol.1700893. Epub 2017 Oct 4.
21. Thorsson V et al. The Immune Landscape of Cancer. *Immunity.* 2018 Apr 17;48(4):812-830.e14. doi: 10.1016/j.immuni.2018.03.023. Epub 2018 Apr 5.
22. Rooney MS et al. Molecular and genetic properties of tumors associated with local immune cytolytic activity. *Cell.* 2015 Jan 15;160(1-2):48-61. doi: 10.1016/j.cell.2014.12.033.
23. Molecular Signatures Database (MSigDB). Available at: <https://www.gsea-msigdb.org/gsea/msigdb/>
24. Barbie DA et al. Systematic RNA interference reveals that oncogenic KRAS-driven cancers require TBK1. *Nature.* 2009 Nov 5;462(7269):108-12. doi: 10.1038/nature08460. Epub 2009 Oct 21.

25. Cristescu R et al. Pan-tumor genomic biomarkers for PD-1 checkpoint blockade-based immunotherapy. *Science*. 2018 Oct 12;362(6411):eaar3593. doi: 10.1126/science.aar3593.
26. Bentham R et al. Using DNA sequencing data to quantify T cell fraction and therapy response. *Nature*. 2021 Sep;597(7877):555-560. doi: 10.1038/s41586-021-03894-5. Epub 2021 Sep 8.
27. ICGC/TCGA Pan-Cancer Analysis of Whole Genomes Consortium. Pan-cancer analysis of whole genomes. *Nature*. 2020 Feb;578(7793):82-93. doi: 10.1038/s41586-020-1969-6. Epub 2020 Feb 5
28. Goldman MJ et al. Visualizing and interpreting cancer genomics data via the Xena platform. *Nat Biotechnol*. 2020 Jun;38(6):675-678. doi: 10.1038/s41587-020-0546-8.
29. Chakravarty D et al. OncoKB: A Precision Oncology Knowledge Base. *JCO Precis Oncol*. 2017 Jul;2017:PO.17.00011. doi: 10.1200/PO.17.00011. Epub 2017 May 16.
30. Edwards NJ et al. The CPTAC Data Portal: A Resource for Cancer Proteomics Research. *J Proteome Res*. 2015 Jun 5;14(6):2707-13. doi: 10.1021/pr501254j. Epub 2015 May 4.
31. National Bioscience Database Center (NBDC) Human Database. Available at: <https://humandbs.biosciencedbc.jp>
32. Anagnostou V et al. Multimodal genomic features predict outcome of immune checkpoint blockade in non-small-cell lung cancer. *Nat Cancer*. 2020 Jan;1(1):99-111. doi: 10.1038/s43018-019-0008-8. Epub 2020 Jan 13.
33. Miao D et al. Genomic correlates of response to immune checkpoint blockade in microsatellite-stable solid tumors. *Nat Genet*. 2018 Sep;50(9):1271-1281. doi: 10.1038/s41588-018-0200-2. Epub 2018 Aug 27.
34. Snyder A et al. Contribution of systemic and somatic factors to clinical response and resistance to PD-L1 blockade in urothelial cancer: An exploratory multi-omic analysis. *PLoS Med*. 2017 May 26;14(5):e1002309. doi: 10.1371/journal.pmed.1002309.
35. Riaz N et al. Tumor and Microenvironment Evolution during Immunotherapy with Nivolumab. *Cell*. 2017 Nov 2;171(4):934-949.e16. doi: 10.1016/j.cell.2017.09.028. Epub 2017 Oct 12.
36. Mariathasan S et al. TGF $\beta$  attenuates tumour response to PD-L1 blockade by contributing to exclusion of T cells. *Nature*. 2018 Feb 22;554(7693):544-548. doi: 10.1038/nature25501. Epub 2018 Feb 14.
37. Liu D et al. Schadendorf D. Integrative molecular and clinical modeling of clinical outcomes to PD1 blockade in patients with metastatic melanoma. *Nat Med*. 2019 Dec;25(12):1916-1927. doi: 10.1038/s41591-019-0654-5. Epub 2019 Dec 2. Erratum in: *Nat Med*. 2020 Jul;26(7):1147.
38. McKenna A et al. The Genome Analysis Toolkit: a MapReduce framework for analyzing next-generation DNA sequencing data. *Genome Res*. 2010 Sep;20(9):1297-303. doi: 10.1101/gr.107524.110. Epub 2010 Jul 19.
39. Babraham Bioinformatics. Trim Galore! Available at: [https://www.bioinformatics.babraham.ac.uk/projects/trim\\_galore](https://www.bioinformatics.babraham.ac.uk/projects/trim_galore)
40. Li H et al. Fast and accurate short read alignment with Burrows-Wheeler transform. *Bioinformatics*. 2009 Jul 15;25(14):1754-60. doi: 10.1093/bioinformatics/btp324. Epub 2009 May 18.
41. Hellmann MD et al. Genomic Features of Response to Combination Immunotherapy in Patients with Advanced Non-Small-Cell Lung Cancer. *Cancer Cell*. 2018 May 14;33(5):843-852.e4. doi: 10.1016/j.ccell.2018.03.018. Epub 2018 Apr 12.
42. Litchfield K et al. Meta-analysis of tumor- and T cell-intrinsic mechanisms of sensitization to checkpoint inhibition. *Cell*. 2021 Feb 4;184(3):596-614.e14. doi: 10.1016/j.cell.2021.01.002. Epub 2021 Jan 27.
43. Henderson S et al. APOBEC-mediated cytosine deamination links PIK3CA helical domain mutations to human papillomavirus-driven tumor development. *Cell Rep*. 2014 Jun 26;7(6):1833-41. doi: 10.1016/j.celrep.2014.05.012. Epub 2014 Jun 5. PMID: 24910434.
44. Haradhvala NJ et al. Distinct mutational signatures characterize concurrent loss of polymerase proofreading and mismatch repair. *Nat Commun*. 2018 May 1;9(1):1746. doi: 10.1038/s41467-018-04002-4. PMID: 29717118; PMCID: PMC5931517.
